# Supplementary material for: Characterization of Fish Community Structure And Development of An Estuarine Fish Community Index For Temporarily Closed Estuaries (TCEs) From India’s Western Coast
Source: Research Square preprint supplement (doi:10.21203/rs.3.rs-402316/v1), 2021-05-11
Supplement: Supplementary file 1 [file 05832972fcd05ed5fe103ae9.xlsx]

## Sheet: Appendix A
Appendix. A Summary of the sampling programs for temporarily closed estuaries (PON-Ponnani, CHT-Chettuva, KOD-Kodungalur-Azhikode, Vem-Vembanad, VEL-Veli-Akkulam, KAD-Kadinamkulam, AKA-Akathumuri, ANC-Anchuthengu, PT-Poonthura, POV-Poovar)
Estuary	Period	Frequency	Stations	Major fishing gear	Species	Families
PON	1997-1999	monthly	6	gill net and cast net	112	53
CHT	2010-2016	post-monsoon	4	gill net and cast net	68	37
KOD	2009-2010	monthly	3	gill net and cast net	63	37
VEM	2016-2017	monthly	6	gill net and cast net	58	32
VEL	2008-2010	seasonally	3	gill net and cast net	35	26
KAD	2012-2013	monthly	3	gill net and cast net	26	18
AKA	2011-2012	monthly	3	gillnet and cast net	50	35
ANC	2003-2004	monthly	3	gillnet and cast net	38	26
PT	2016-2017	monthly	3	gill net and cast net	41	27
POV	2016-2017	weekly	3	gill net and cast net	28	21

## Sheet: Appendix B
Appendix. B Summary of the characteristics of the temporarily closed estuaries (PON-Ponnani, CHT-Chettuva, KOD-Kodungalur-Azhikode, Vem-Vembanad, VEL-Veli-Akkulam, KAD-Kadinamkulam, AKA-Akathumuri, ANC-Anchuthengu, PT-Poonthura, POV-Poovar
Estuary	Characteristics
PON	The total area covered by the estuary is 908 ha. The Bharathapuzha river, the second longest river in Kerala, originating from the Western Ghats, joins the Arabian Sea at this estuary. The estuarine system is exposed to tides from the Arabian Sea, and hence water is brackish almost throughout the year
CHT	The total area covered by the estuary is 714 ha. The mean salinity, temperature and dissolved oxygen of the estuary recorded were 13.4 ppt, 30°C, 4.5 ppm respectively
KAD	This estuary has an area of 700 ha. Tides in the estuary are semidiurnal, with average microtidal tidal range of 1.1 m. The mean salinity, temperature and dissolved oxygen of the estuary recorded were 16.4 ppt, 29°C and 5.1ppm respectively
VEM	Vembanad estuary having a length of 96 km and a surface area of 1512 km2 is an extensively studied estuary in Kerala. Vembanad lake along with adjacent Kole lands have been declared as a wetland of international importance and is one among the three Ramsar sites in Kerala.
VEL	The total area of this estuary is 135 km2 of which the lake occupies a space of 1.16 km2. This estuary is fed by Kannammoola stream, Kulathur stream, Amaizhanchan stream and Sreekaryam stream. The maximum depth of the estuary was recorded to be 3 m, and the entrance depth is 3.7m.
KAD	It’s one of the largest among the estuaries of Trivandrum district with small and shallow estuarine mouth. This backwater lies almost parallel to the adjoining Laccadive Sea for some distance and has a temporary connection with these at the north-western region.
AKA	This estuary is situated 34 km north of Trivandrum district. The bar mouth of this estuary develops at Perumathura and is fed by the Vamanapuram river. There are no other records of the fishery resources of this estuary.
ANC	The estuary is shallow in nature, and depth is not more than 5m. It has no permanent connection with the Arabian sea, but seasonally gets connected with the sea through the opening of the sand bar at Perumathura.
PT	The estuary is a typical sandbar estuary, circular in shape, microtidal, small, shallow and partially mixed with an average tidal range of 1.5 m. The Poonthura estuary supports rich flora and fauna, including black clams and mangrove associates. The total length of the estuary is 4.35 Km, and the mean width is 0.1 Km
POV	Poovar estuary belongs to the bar-built type, and the sand bar of the estuary opens either due to monsoonal floods or cut open manually thus establishing connection with the sea. The river Neyyar empties in to this estuary. No other published data on fish resources from this site are available as the estuary is of least concern.

## Sheet: Appendix C
Appendix. C Description of each guild included in the study according to Elliott et al., 2007
Sl.No	Ecological guild	Abbreviation	Description
1	Estuarine resident	ER	Species complete their entire life cycle in the estuary itself
2	Marine migrant	MM	Truly marine species, juveniles of these species regularly enter estuaries in considerable number.
3	Marine stragglers	MS	Stenohaline species found in coastal marine waters and spawns at sea. They enter in to estuary occasionally with least numbers.
4	Freshwater stragglers	FS	Mainly freshwater species and its distribution is restricted to low saline areas of estuary
5	Anadromous	AN	The species which growth occur in sea and migrate in to river for spawning.
6	Freshwater migrants	FM	Primarily freshwater species and it found regularly in estuaries
	Dietary preference guild
1	Zoobenthivore	ZB	Feeds mainly on invertebrates associated with the substratum
2	Detritivore	DV	Feeds mainly on detritus and or microphytobenthos
3	Piscivores	PV	Feeds mainly on fish or fish flesh
4	Zooplanktivore	ZP	Feeds mainly on zooplankton
5	Omnivore	OV	Feeds mainly on algae, periphyton, macrophytes, infauna and epifauna
6	Herbivore	HV	Feeds mainly on plankton (micro/macroalgae)

## Sheet: Appendix D
Appendix. D EFCI , metric thresholds and scoring criteria for temporarily closed estuaries (PON-Ponnani, CHT-Chettuva, KOD-Kodungalur-Azhikode, Vem-Vembanad, VEL-Veli-Akkulam, KAD-Kadinamkulam, AKA-Akathumuri, ANC-Anchuthengu, PT-Poonthura, POV-Poovar
Score	5	3	1	Score for	Score for	Score for	Score for	Score for	Score for	Score for	Score	Score for	Score
				PON	CHT	KAD	KOD	VEM	AKA	VEL	For ANC	PT	For POV
Species diversity
1) Total number of taxa	>37	37-21	<21	5	5	3	5	5	5	3	5	5	3
2) Rare or threatened species	present	absent		3	3	3	5	5	3	3	3	3	3
3) Exotic or introduced specie		absent	present	1	1	1	1	1	3	1	1	1	1
4) Species composition (% similarity to reference)	≥80%	<80% and ≥50%	<50%	3	3	3	3	3	3	3	1	3	3
Species abundance
5) Species relative abundance (% similarity to reference)	≥60%	<60% and ≥40%	<40%	5	3	3	3	5	3	5	1	1	3
6) Number of species that make up 90% of the abundance	>13	<13 and≥ 8	<8	5	3	3	3	5	3	3	1	3	1
Nursery function
7) Number of estuarine resident taxa	≥7	<7-14	<4	5	5	3	5	5	5	3	3	5	3
8) Number of estuarine-dependent marine taxa	≥23	<23 - ≥14	<14	5	5	1	5	5	5	3	5	3	3
9) Relative abundance of estuarine resident taxa	25-75%	≥10% and <25% or >75% and ≤90%	<10% or >90%	3	3	3	3	3	3	3	3	3	3
10) Relative abundance of estuarine-dependent marine taxa	25-75%	≥10% and <25% or >75% and ≤90%	<10% or >90%	3	5	3	5	5	5	5	3	5	5
Trophic integrity
11) Number of benthic invertebrate feeding taxa	≥13	13 - 7	<7	3	3	1	3	3	1	1	1	1	1
12) Number of piscivorous taxa	≥6	>4-8	<4	3	3	1	5	1	1	1	1	3	3
13) Relative abundance of benthic invertebrate feeding taxa	≥25%	25-10%	<10%	3	1	3	3	3	1	3	1	1	3
14) Relative abundance of piscivorous taxa	≥2%	2 -1%	<1%	5	5	5	5	5	3	1	5	5	5
Total				52	48	36	34	54	44	38	34	42	40

## Sheet: Appendix E
Appendix. E Reference checklist of fishes recorded in temporarily closed estuariess along with its ecological and feeding guild. The estuaries (PON-Ponnani, CHT-Chettuva, KOD-Kodungalur-Azhikode, Vem-Vembanad, VEL-Veli-Akkulam, KAD-Kadinamkulam, AKA-Akathumuri, ANC-Anchuthengu, PT-Poonthura, POV-Poovar
ABBRV	Species	Family	Ecological guild	Feeding guild
Ssg	Sillago sihama	Sillaginidae	MM	ZB
Mg	Mystus gulio	Bagridae	FS	PV
Sic	Secutor insidiator	Leiognathidae	MM	ZB
esu	Etroplus suratensis	Cichlidae	ER	OV
Cn	Chanda nama	Ambassidae	ER	ZB
Emm	Pseudetroplus maculatus	Cichlidae	ER	OV
Mcs	Megalops cyprinoides	Megalopidae	MM	PV
Lp	Chelon parsia	Mugilidae	MM	DV
More	Oreochromis mossambicus	Cichlidae	FM	OV
Mce	Mugil cephalus	Mugilidae	MM	DV
Bo	Brachirus orientalis	Soleidae	MS	ZB
Etp	Epinephelus tauvina	Serraniade	MS	PV
Ams	Arius maculatus	Ariidae	MM	PV
Aa	Ambassis ambassis	Ambassidae	ER	ZB
At	Anabas testudineus	Anabantidae	FS	ZB
Eu	Epinephelus undulosus	Serranidae	MS	PV
Cc	Cynoglossus cynoglossus	Cynoglossidae	MS	ZB
Gf	Gerres filamentosus	Gerreidae	MM	ZB
Cmm	Channa marulius	Channidae	FS	PV
Pa	Pampus argenteus	Stromateidae	MS	PV
Ci	Caranx ignobilis	Carangidae	MS	PV
Ara	Arius arius	Ariidae	MM	PV
Ma	Monodactylus argentius	Monodactylidae	MM	DV
Lmz	Planiliza macrolepis	Mugilidae	MM	DV
Vc	Osteomugil cunnesius	Mugilidae	MM	DV
Nn	Nematalosa nasus	Clupeidae	AN	HV
Si	Stolephorus indicus	Engraulidae	MM	ZP
Am	Atule mate	Carangidae	MM	PV
Sa	Scatophagus argus	Scatophagidae	ER	OV
Gmz	Gazza minuta	Leiognathidae	MM	ZB
Emt	Elops machnata	Elopidae	MM	PV
Df	Dawkinsia filamentosa	Cyprinidae	FS	HV
Pw	Periophthalmus weberi	Gobidae	ER	ZB
Cct	Gibelion catla	Cyprinidae	FS	ZP
Lj	Lutjanus johnii	Lutjanidae	FS	PV
Gse	Gerres setifer	Gerreidae	MM	ZB
Gg	Glossogobius giuris	Gobiidae	ER	OV
Csh	Channa striata	Channidae	FS	PV
Tbr	Trachinotus blochii	Carangidae	FS	PV
Csx	Caranx sexfasciatus	Carangidae	MS	PV
Ab	Anguilla bicolor	Anguilidae	FS	DV
Ts	Thryssa selirostris	Engraulidae	MM	ZP
Tv	Thryssa vitrirostris	Engraulidae	MM	ZP
As	Arius subrostratus	Ariidae	MM	PV
Hx	Hyporhamphus xanthopterus	Hemiramphidae	MM	PV
Ss	Strongylura strongylura	Belonidae	MM	PV
Pi	Platycephalus indicus	Platycephalidae	MS	PV
Tj	Terapon jarbua	Teraponidae	MM	OV
Leq	Leiognathus equulus	Leiognathidae	MM	ZB
Lsp	Leiognathus splendens	Leiognathidae	MM	ZB
Ot	Oxyurichthys tentacularis	Gobiidae	MM	PV
Sis	siganus sutor	Siganidae	MM	HV
Sia	siganus argenteus	Siganidae	MM	HV
Sl	siganus luridus	Siganidae	MM	HV
Rk	Rastrelliger kanagurta	Scomberidae	MM	ZP
Cpp	cynoglossus punticeps	Cynoglosssidae	MS	ZB
Eo	Euryglossa orientalis	Soleidae	MS	ZB
Ars	Arothron stellatus	Tetraodontidae	MS	ZB
Sg	sardinella gibbosa	Clupeidae	MM	HV
Dm	Dayella malabarica	Clupeidae	MM	ZP
Tm	Thryssa malabarica	Engraulidae	MM	ZP
Cb	Clarius batrachus	Claridae	FS	OV
Obb	Ompok bimaculatus	Siluridae	FM	OV
Lat	chelon planiceps	Mugilidae	MM	DV
Sle	strongylura leiura	Belonidae	MS	PV
Cm	Carangoides malabaricus	Carangidae	MS	PV
Ak	Alepes kleinnii	Carangidae	MS	PV
Sc	Selar crumenophthalmus	Carangidae	MS	PV
Lbr	Leiognathus brevirostris	Leiognathidae	MM	ZB
Ga	Gerres abbreviatus	Gerreidae	MM	ZB
Go	Gerres oyena	Gerreidae	MM	ZB
St	scombroides tol	Carangidae	MS	PV
Pc	pampus chinensis	Stromateidae	MS	ZP
Sj	siganus javus	Siganidae	MM	HV
La	lutjanus argentimaculatus	Lutjanidae	FS	PV
Cco	Chanos chanos	Chanidae	MM	HV
Ls	Lobotes surinamensis	Lobotidae	MS	PV
Em	Epinephelus malabaricus	Serranidae	MS	PV
Pus	Systomus sarana	Cyprinidae	FS	HV
Pua	puntius ambhibius	Cyprinidae	FS	OV
Put	Pethia ticto	Cyprinidae	FS	OV
Cp	Chelonodon patoca	Tetraodontidae	MM	ZB
Tb	Triacanthus biaculeatus	Triacanthidae	MS	ZB
Agy	Ambassis gymnocephalus	Ambassidae	ER	ZB
Al	Aplochelius lineatus	Aplocheilidae	FM	DV
Cmr	cirrhinus mrigala	Cyprinidae	FS	OV
Vs	Crenimugil seheli	Mugilidae	MM	DV
Pv	puntius vittatus	Cyprinidae	FS	OV
Rd	rasbora daniconius	Cyprinidae	FS	DV
Cg	Clarius garipienus	Claridae	FS	OV
Hf	heteropneustes fossilis	Heteropneustidae	FS	PV
Lc	lates calcarifer	Latidae	CA	PV
Chp	caranx hippos	Carangidae	MS	PV
Cam	caranx melampygus	Carangidae	MS	PV
Ef	eleotris fusca	Eleotridae	ER	ZB
Om	oxyurichthys microlepis	Gobiidae	ER	ZB
Ac	Apistus carinatus	Apistidae	MS	PV
Pda	Parambassis dayi	Ambassidae	ER	ZB
Abe	Anguilla bengalensis	Anguilidae	FS	DV
Hb	Horabagrus brachysoma	Bagridae	FS	PV
Mo	Mystus oculatus	Bagridae	FS	PV
Xc	Xenentodon cancila	Belonidae	FM	PV
Mc	Megalaspys cordyla	Carangidae	MS	PV
Slo	Sardinella longiceps	Clupeidae	MM	HV
Cya	Cynoglossus arel	Cynoglossidae	MS	ZB
Amm	Amblypharyngodon microlepis	Cyprinidae	FS	DV
Ld	Labeo dussumieri	Cyprinidae	FS	HV
Lr	Labeo rohita	Cyprinidae	FS	HV
Punt	Puntius amphibius	Cyprinidae	FS	OV
Ach	Anadontostoma chacunda	Clupeidae	AN	HV
Stc	Stolephorus commersonii	Engraulidae	MM	ZP
Td	Thryssa dussumieri	Engraulidae	MM	ZP
Led	karalla dussumieri	Leiognathidae	MM	ZB
Nn	Nandus nandus	Nandidae	FS	ZB
Pf	Pristolepis fasciata	Pristolepididae	FS	HV
Et	Eleutheronema tetradactylum	Polynemidae	MM	PV
Jc	Johnius coitor	Sciaenidae	MM	PV
Wa	Wallago attu	Siluridae	FS	PV
Rg	Rhynchorhamphus georgii	Hemiramphidae	MM	PV
vsp	Valamugil speigleri	Mugilidae	MM	DV
Bg	Bunaka gyrinoides	Eleotridae	ER	OV
Bb	Butis butis	Eleotridae	ER	ZB
Ge	Gerres erythrourus	Gerreidae	MM	ZB
Gm	Gobiopsis macrostoma	Gobiidae	ER	OV
Tbu	Taenioides buchanani	Oxudercidae	ER	DV
Tci	Taenioides cirratus	Oxudercidae	ER	DV
Sca	Siganus canaliculatus	Siganidae	MM	HV
Up	Upeneus vittatus	Mullidae	MS	PV
Trv	Trypauchen vagina	Oxudercidae	MS	OV
Ups	Upeneus sulphureus	Mullidae	MS	PV
Jb	Johnius belangerii	Sciaenidae	MM	PV
Ob	Otolithoides biauritus	Sciaenidae	MM	PV
Lbb	Leiognathus berbis	Leiognathidae	MM	ZB
Lm	Lutjanus malabaricus	Lutjanidae	FS	PV
es	Eubleekeria splendens	Leiognathidae	MM	ZB
Ll	Lethrinus lentjan	Lethrinidae	MS	PV
Pd	Plicofollis dussumieri	Ariidae	MM	PV
Cym	Cynoglossus macrostomus	Cynoglossidae	MS	ZB
Psa	Pseudorhombus arsius	Paralichthydae	MM	ZB
Cr	Parambassis ranga	Ambassidae	ER	ZB
An	Antennatus nummifer	Antennariidae	MS	ZB
Aniu	Nemapteryx nenga	Ariidae	MM	PV
Carg	Carangoides chrysophrys	Carangidae	MS	PV
Cag	Caranx caballus	Carangidae	MS	PV
Cai	Carangoides praeustus	Carangidae	MS	PV
Clc	Gadusia chapra	Clupeidae	FS	DV
Cyd	Cynoglossus dubius	Cynoglossidae	MS	ZB
Cynl	Cynoglossus lida	Cynoglossidae	MS	ZB
Drp	Drepane punctata	Drepaneidae	MS	ZB
Dua	Dussumieria acuta	Clupeidae	MM	HV
Els	Elops saurus	Elopidae	MM	PV
Enh	Thryssa hamiltonii	Engraulidae	MM	ZP
Epd	Epinephlus diacanthus	Serranidae	MS	PV
est	escualosa thoracata	Clupeidae	MM	HV
Gv	Acentrogobius viridipunctatus	Gobiidae	ER	OV
Hyl	Hyporhamphus limbatus	Hemiramphidae	MM	PV
Lal	Lagocephalus lunaris	Tetraodontidae	MM	ZB
Lum	Lutjanus lutjanus	Lutjanidae	FS	PV
Mem	Mene maculata	Meneidae	MS	ZB
Or	Otolithes ruber	Sciaenidae	MM	PV
Ped	Pellona ditchela	Pristigastesidae	MM	HV
Pam	Platycephalus indicus	Platycephalidae	MS	ZB
Prm	Pristolepis marginata	Pristolepidae	FS	ZB
Psj	Pseudorhombus javanicus	Paralichthyidae	MS	ZP
Ric	Rita chrysea	Bagridae	FS	ZB
Sb	Salmostoma boopis	Cyprinidae	FS	HV
Sr	Secutor ruconius	Leiognathidae	ER	ZB
Spo	Sphyraena obtusata	Sphyraenidae	MM	PS
Thm	Thryssa mystax	Engraulidae	MM	ZP
Cal	Carcharhinus limbatus	Carcharhinidae	MS	PV
Slco	Scoliodon laticaudus	Carcharhinidae	MS	PV
Spl	Sphyrna lewini	Sphyrnidae	MS	PV
Muc	Muraenesox cinereus	Muraenesocidae	MS	PV
Lyt	Gymnothorax tile	Muraenidae	MS	PV
Hii	Tenualosa ilisha	Clupeidae	AN	HV
Hq	Herklotsichthys quadrimaculatus	Clupeidae	MM	ZP
Sad	Sardinella sindensis	Clupeidae	MM	HV
Cs	Corica soborna	Clupeidae	MM	HV
Im	Ilisha melastoma	Pristigastesidae	AN	HV
Mm	Mystus montanus	Bagridae	MM	ZB
Bm	Bregmaceros mcclellandi	Bregmacesotidae	MS	ZP
Hd	Hyporhamphus dussumieri	Hemiramphidae	MM	PV
Mcu	Microphis cuncalus	Syngnathidae	ER	HV
Scl	Scorpaenopsis cirrosa	Scorpaenidae	MS	PV
Gs	Grammoplites scaber	Platycephalidae	MS	PV
Lac	Lactarius lactarius	Lactaridae	MM	ZB
Ald	Alepes djedaba	Carangidae	MS	PV
Cf	Carangoides ferdau	Carangidae	MS	PV
Ch	Carangoides hedlandensis	Carangidae	MS	PV
Cap	Carangoides praeustus	Carangidae	MS	PV
Scc	Scomberomorus commerson	Scombridae	MS	PV
Pn	Parastromateus niger	Carangidae	MS	PV
Lb	Photopectoralis bindus	Leiognathidae	MM	ZB
Le	Lu tjanus ehrenbergii	Lutjanidae	FS	PV
Lf	Lutjanus fulviflamma	Lutjanidae	FS	PV
Poa	Pomadasys argenteus	Haemulidae	MS	ZB
Pom	Pomadasys maculatus	Haemulidae	MS	ZB
Day	Daysciaena albida	Sciaenidae	MM	PV
Des	Dendrophysa russelli	Sciaenidae	MM	PV
Spb	Sphyraena barracuda	Sphyrraenidae	MM	PV
Lei	Leptomelanosoma indicum	Polynemidae	MS	PV
Can	Acanthurus nigrofuscus	Acanthuridae	MS	ZB
Zx	Zebrasoma xanthurum	Acanthuridae	MS	HV
Awg	Awaous gutum	Gobiidae	ER	OV
Olc	Oligolepis cylindriceps	Gobiidae	ER	OV
Sig	Sicyopterus griseus	Gobiidae	ER	OV
Trl	Trichiurus lepturus	Trichiuridae	MM	PV
Scg	Scomberomorus guttatus	Scombridae	MS	PV
Pe	Pseudorhombus malayanus	Paralichthyidae	MM	PV
Cyl	Cynoglossus lingua	Cynoglossidae	MS	ZB
Pab	Paraplagusia bilineata	Cynoglossidae	MS	ZB
